# Supplementary material for: Commensal and Opportunistic Bacteria Present in the Microbiota in Atlantic Cod (Gadus morhua) Larvae Differentially Alter the Hosts’ Innate Immune Responses
Source: MDPI journal article supplement (doi:10.3390/microorganisms10010024), 2021-12-24
Supplement: s1 [file s1]

Table S4: Enriched GO terms in conventional larvae compared with both germ-free and gnotobiotic cod larvae.

| GO Term                                                                                          | Gene Count | PValue | Genes                                                                                                                     |
|--------------------------------------------------------------------------------------------------|------------|--------|---------------------------------------------------------------------------------------------------------------------------|
| GO:1902531~regulation of intracellular signal transduction                                       | 12         | 0.005  | IRAK1, SH3RF1, RFC3, PLEKHG1, ARHGAP44, PKD2, AKAP12, PIK3CA, ASPH, ITGB1, CHD3, DNMBP                                    |
| GO:0043085~positive regulation of catalytic activity                                             | 11         | 0.008  | IRAK1, DCUN1D1, RFC3, PLEKHG1, ARHGAP44, CHTF8, PKD2, PIK3CA, ASPH, ITGB1, DNMBP                                          |
| GO:0035556~intracellular signal transduction                                                     | 15         | 0.008  | IRAK1, SH3RF1, AKAP12, GUCY2C, ITGB1, NDNF, DNMBP, RFC3, STAC2, PLEKHG1, ARHGAP44, PKD2, PIK3CA, ASPH, CHD3               |
| GO:0031585~regulation of inositol 1,4,5-trisphosphate-sensitive calcium-release channel activity | 2          | 0.01   | PKD2, ASPH                                                                                                                |
| GO:1900262~regulation of DNA-directed DNA polymerase activity                                    | 2          | 0.02   | RFC3, CHTF8                                                                                                               |
| GO:1900264~positive regulation of DNA-directed DNA polymerase activity                           | 2          | 0.02   | RFC3, CHTF8                                                                                                               |
| GO:0050790~regulation of catalytic activity                                                      | 13         | 0.02   | IRAK1, SH3RF1, CHTF8, ITGB1, SSPO, DNMBP, RFC3, DCUN1D1, PLEKHG1, ARHGAP44, PKD2, PIK3CA, ASPH                            |
| GO:0044093~positive regulation of molecular function                                             | 11         | 0.02   | IRAK1, DCUN1D1, RFC3, PLEKHG1, ARHGAP44, CHTF8, PKD2, PIK3CA, ASPH, ITGB1, DNMBP                                          |
| GO:0009966~regulation of signal transduction                                                     | 14         | 0.03   | IRAK1, SH3RF1, THRA, AKAP12, ITGB1, DNMBP, RFC3, PLEKHG1, ARHGAP44, PKD2, PIK3CA, ASPH, CHD3, ZNF423                      |
| GO:0051347~positive regulation of transferase activity                                           | 6          | 0.03   | IRAK1, DCUN1D1, RFC3, CHTF8, PKD2, PIK3CA                                                                                 |
| GO:0019219~regulation of nucleobase-containing compound metabolic process                        | 18         | 0.03   | RBM22, IRAK1, THRA, CHTF8, AKAP12, MRGBP, NRIP2, DPY30, RFC3, CIR1, NKX1-2, HES4, RNF38, PKD2, PIK3CA, ASPH, CHD3, ZNF423 |
| GO:0048514~blood vessel morphogenesis                                                            | 5          | 0.04   | AAMP, PKD2, PIK3CA, ITGB1, NDNF                                                                                           |
| GO:0035023~regulation of Rho protein signal transduction                                         | 3          | 0.04   | PLEKHG1, ITGB1, DNMBP                                                                                                     |
| GO:2000811~negative regulation of anoikis                                                        | 2          | 0.04   | PIK3CA, ITGB1                                                                                                             |
| GO:0051056~regulation of small GTPase mediated signal transduction                               | 4          | 0.05   | PLEKHG1, ARHGAP44, ITGB1, DNMBP                                                                                           |
| GO:0042994~cytoplasmic sequestering of transcription factor                                      | 2          | 0.05   | THRA, PKD2                                                                                                                |
| GO:0071456~cellular response to hypoxia                                                          | 3          | 0.05   | IRAK1, SLC2A4, NDNF                                                                                                       |
