# Supplementary material for: Commensal and Opportunistic Bacteria Present in the Microbiota in Atlantic Cod (Gadus morhua) Larvae Differentially Alter the Hosts’ Innate Immune Responses
Source: MDPI journal article supplement (doi:10.3390/microorganisms10010024), 2021-12-24
Supplement: s1 [file s1]

Table S5: Taxonomy and most similar “type strains” for the six OTUs classified as *Vibrio* as inferred from the Ribosomal Database Project (RDP).

| OTU     | Type strain (closest matches)                                                                                                                                                                                                                                                | S_ab score* |
|---------|------------------------------------------------------------------------------------------------------------------------------------------------------------------------------------------------------------------------------------------------------------------------------|-------------|
| OTU 829 | <i>Vibrio lentus</i> , <i>Vibrio tasmaniensis</i> , <i>Vibrio kanaloae</i> , <i>Vibrio atlanticus</i> , <i>Vibrio hemicentroti</i>                                                                                                                                           | 0.945       |
| OTU 2   | <i>Vibrio lentus</i> , <i>Vibrio tasmaniensis</i> , <i>Vibrio kanaloae</i> , <i>Vibrio atlanticus</i> , <i>Vibrio hemicentroti</i>                                                                                                                                           | 1.000       |
| OTU 233 | <i>Vibrio lentus</i> , <i>Vibrio tasmaniensis</i> , <i>Vibrio kanaloae</i> , <i>Vibrio atlanticus</i> , <i>Vibrio hemicentroti</i>                                                                                                                                           | 0.884       |
| OTU 11  | <i>Vibrio ichthyenteri</i> , <i>Vibrio neptunius</i> , <i>Vibrio brasiliensis</i> , <i>Vibrio xuii</i> , <i>Vibrio rotiferianus</i> , <i>Vibrio campbellii</i> , <i>Vibrio hepatarius</i> , <i>Vibrio sinaloensis</i> , <i>Vibrio sagamiensis</i> , <i>Vibrio alfacensis</i> | 1.000       |
| OTU 61  | <i>Vibrio areningrae</i>                                                                                                                                                                                                                                                     | 1.000       |
| OTU 402 | <i>Vibrio anguillarum</i>                                                                                                                                                                                                                                                    | 0.946       |

\* A seqmatch score (S\_ab) were reported between every closely related sequence, which represents the number of unique 7-base oligomers shared between the sample sequence and a given RDP sequence divided by the lowest number of unique oligos in either of the two sequences (Wang et al. 2007).
