# Supplementary material for: Commensal and Opportunistic Bacteria Present in the Microbiota in Atlantic Cod (Gadus morhua) Larvae Differentially Alter the Hosts’ Innate Immune Responses
Source: MDPI journal article supplement (doi:10.3390/microorganisms10010024), 2021-12-24
Supplement: s1 [file s1]

Table S3: List of down-regulated genes (cut-off value of log2 fold change > 0.8) in gnotobiotic cod larvae compared with germ-free cod larvae at 16 dph.

| Accession            | Gene name | Description                                               | Log2 fold change | Adjusted p-value |
|----------------------|-----------|-----------------------------------------------------------|------------------|------------------|
| ENSGAUG00000005408   | CUZD1     | Zona pellucida-like domain-containing protein             | -2.668           | 0.000542         |
| ENSGAUG00000006436   | EPX       | Eosinophil peroxidase                                     | -1.688           | 0.011975         |
| ENSGAUG00000012193   | EPX       | Eosinophil peroxidase                                     | -1.65            | 0.01609          |
| ENSGAUG00000000611   | RBL       | Rhamnose-binding lectin                                   | -1.644           | 3.78E-07         |
| ENSGAUG00000008126   | ZGP16     | Zymogen granule membrane protein 16                       | -1.509           | 3.22E-05         |
| ENSGAUG00000014891   | ZG16p     | Zymogen granule membrane protein 16-like                  | -1.292           | 4.84E-05         |
| ENSGAUG00000001749   | GPRC6A    | G-protein coupled receptor family C group 6 member A      | -1.287           | 1.65E-07         |
| ENSGAUG00000010274   | MPO       | Myeloperoxidase precursor                                 | -1.253           | 0.014335         |
| ENSGAUG00000005121   | CYBB      | Cytochrome b-245 heavy chain-like                         | -1.252           | 9.33E-05         |
| ENSGAUG00000001749_1 | GPRC6A    | G-protein coupled receptor family C group 6 member A      | -1.191           | 7.31E-07         |
| ENSGAUG00000006000   | Irg1      | Immune-responsive gene 1 protein-like                     | -1.178           | 3.56E-05         |
| ENSGAUG00000020348   | FEL       | Fish-egg lectin                                           | -1.068           | 0.000455         |
| ENSGAUG00000014896   | ApoL1     | ApoL super family protein                                 | -0.985           | 0.000575         |
| ENSGAUG00000015892   | ARHGAP6   | Rho GTPase-activating protein 6                           | -0.915           | 5.90E-05         |
| ENSGAUG00000005518   | NKX3-1    | Homeobox protein Nkx-3.1-like                             | -0.909           | 0.018765         |
| ENSGAUG00000007017   | EHF       | Ets homologous factor related protein                     | -0.894           | 0.00049          |
| ENSGAUG00000005387   | predicted | Uncharacterized protein                                   | -0.891           | 0.002385         |
| ENSGAUG00000009769   | PGLYRP1   | N-acetylmuramoyl-L-alanine amidase-like                   | -0.879           | 0.01099          |
| ENSGAUG00000015302   | TMPRSS9   | Transmembrane protease serine 9-like                      | -0.85            | 0.01579          |
| ENSGAUG00000006012   | predicted | YrdC domain-containing protein                            | -0.819           | 0.017235         |
| ENSGAUG00000009693   | PRSS27    | Serine protease 27-like, predicted                        | -0.817           | 0.013225         |
| ATLCOD1ESTi20380     |           | Unknown transcript; no similarity to other known proteins | -1.39            | 0.00072          |
| JW189634.1           |           | Unknown transcript; no similarity to other known proteins | -1.38            | 0.00305          |
