# Supplementary material for: Commensal and Opportunistic Bacteria Present in the Microbiota in Atlantic Cod (Gadus morhua) Larvae Differentially Alter the Hosts’ Innate Immune Responses
Source: MDPI journal article supplement (doi:10.3390/microorganisms10010024), 2021-12-24
Supplement: s1 [file s1]

## Commensal and opportunistic bacteria present in the microbiota in Atlantic cod (*Gadus morhua*) larvae differentially alter the hosts' innate immune responses.

Ragnhild Inderberg Vestrum<sup>1§</sup>, Torunn Forberg<sup>1§</sup>, Birgit Luef<sup>1</sup>, Ingrid Bakke<sup>1</sup>, Per Winge<sup>2</sup>, Yngvar Olsen<sup>2</sup> and Olav Vadstein<sup>1,\*</sup>

\*Authors contributed equally

### Affiliations

1. Department of Biotechnology and Food Science, Norwegian University of Science and Technology, Trondheim
2. Department of Biology, Norwegian University of Science and Technology, Trondheim

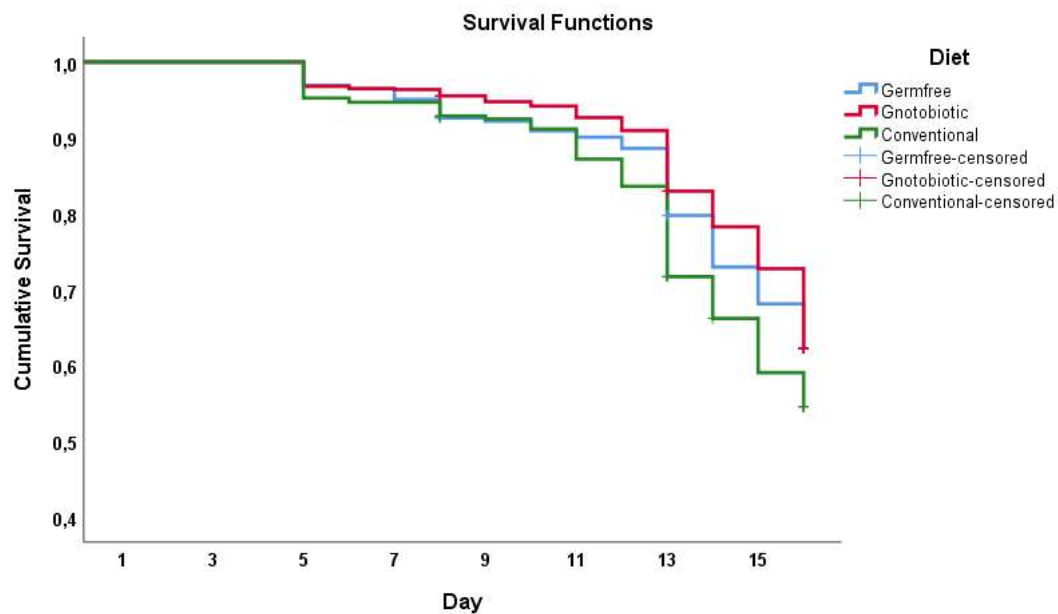

Figure S1: Kaplan-Meier survival curves. Censored events represent rearing flasks that were samples.

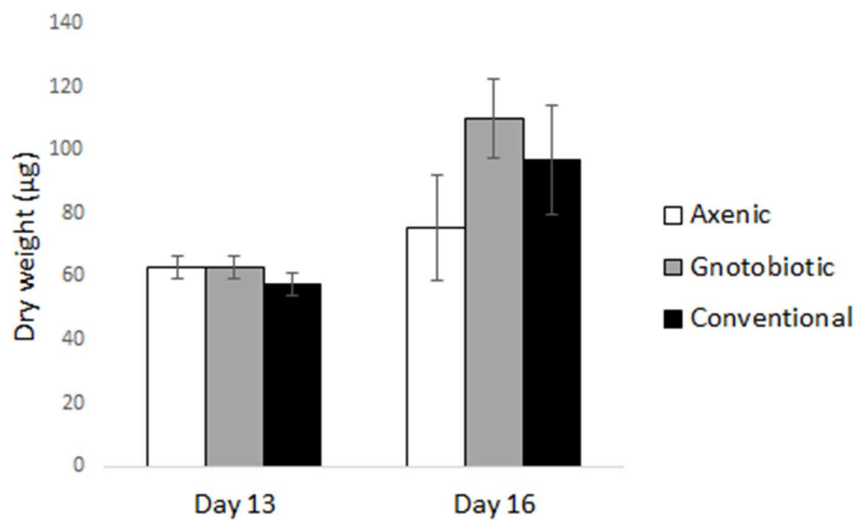

Figure S2: Dry weight of cod larvae. Dry weight (µg) of cod larvae in axenic (germ-free), gnotobiotic and conventional treatments at 13 and 16 dph.

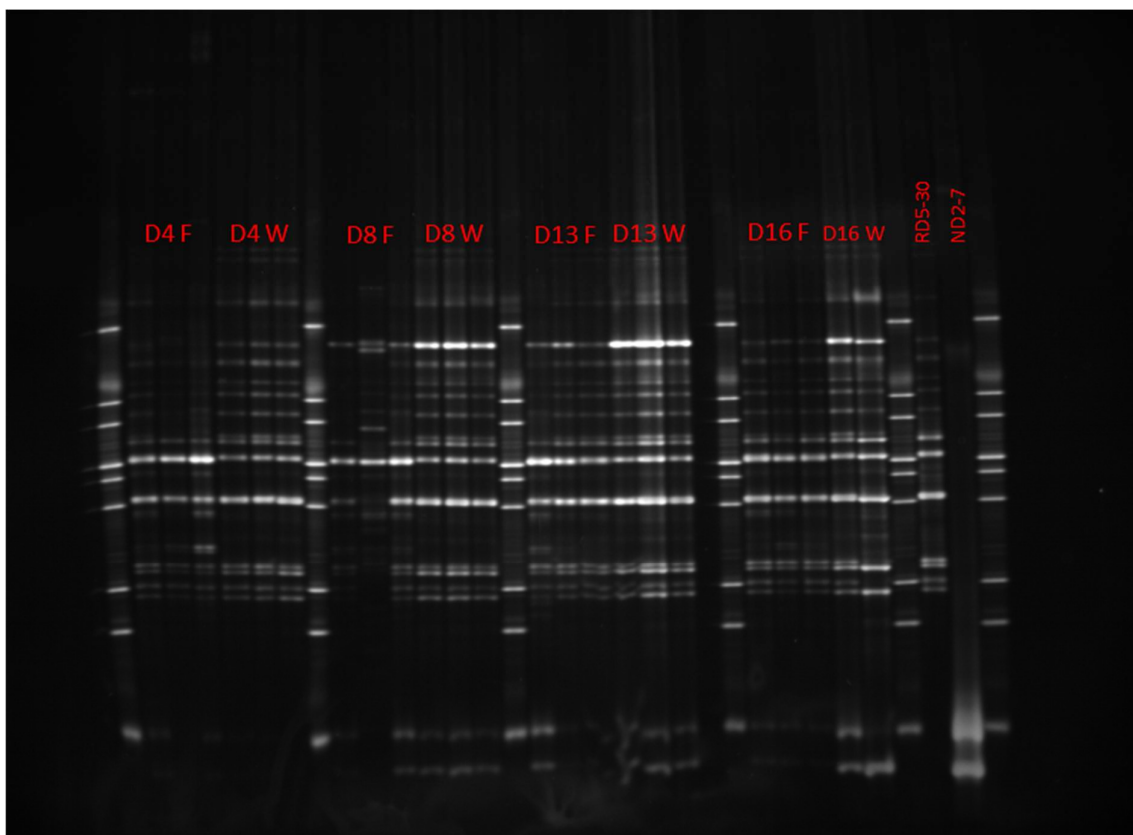

Figure S3: DGGE gel. Picture of DGGE gel with fish (F) and water (W) samples from the gnotobiotic treatment at 4, 8, 13 and 16 dph (D4-D16). Unmarked wells are ladders. Pure strains are in the two last wells; RD5-30 *Vibrio gallicus*., and ND2-7 *Microbacterium* sp.

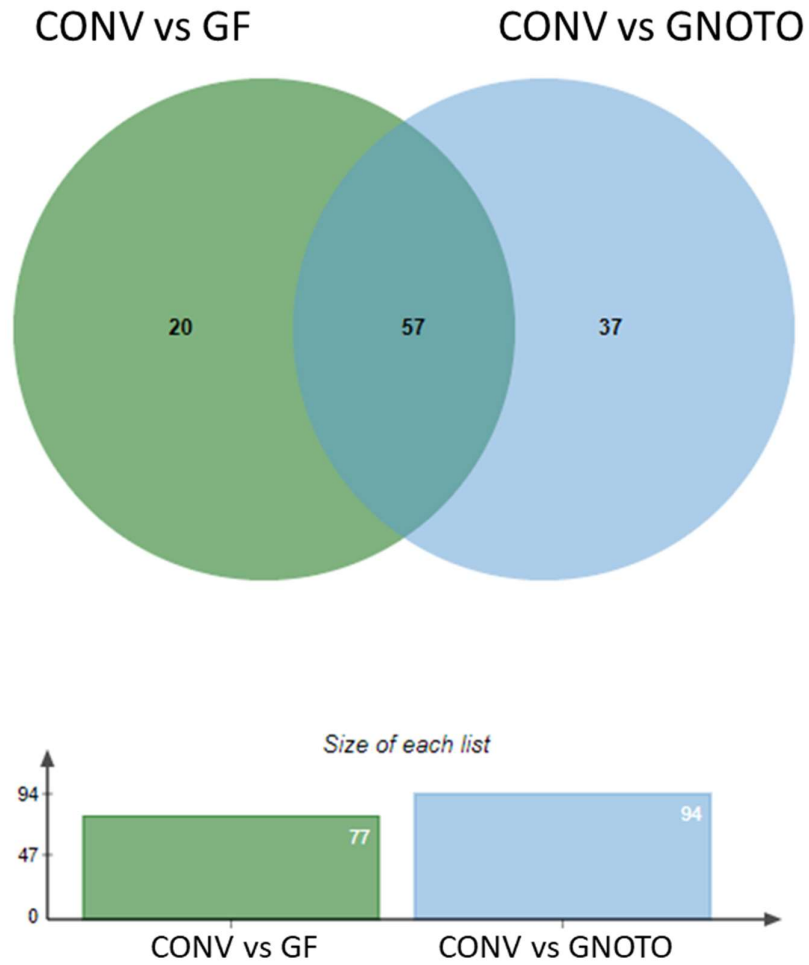

Figure S4: Venn diagram. Venn diagram showing the number of shared and unique genes up-regulated in conventional cod larvae compared with germ-free cod larvae (CONV vs GF), and up-regulated in conventional cod larvae compared with gnotobiotic cod larvae (CONV vs GNOTO).
