# Supplementary material for: Commensal and Opportunistic Bacteria Present in the Microbiota in Atlantic Cod (Gadus morhua) Larvae Differentially Alter the Hosts’ Innate Immune Responses
Source: MDPI journal article supplement (doi:10.3390/microorganisms10010024), 2021-12-24
Supplement: s1 [file s1]

Table S2: List of up-regulated genes (cut-off value of log2 fold change > 0.8) in conventional cod larvae compared with germ-free cod larvae at 16 dph.

| Accession number     | Gene name | Description                                                                                    | Log2 fold change | Adjusted p-value |
|----------------------|-----------|------------------------------------------------------------------------------------------------|------------------|------------------|
| ENSGAUG00000001043   | SLC2A11   | Solute carrier family 2 (facilitated glucose transporter), member 11-like                      | 2.256            | 0.001395         |
| ENSGAUG00000000097   | LECT2     | Leukocyte cell-derived chemotaxin 2                                                            | 2.104            | 0.00261          |
| ENSGAUG00000016719   | CXCL8     | Interleukin 8; partial ORF                                                                     | 1.898            | 0.018435         |
| ENSGAUG00000009351   | PRAF2     | PRA1 family protein 2                                                                          | 1.779            | 0.02513          |
| ENSGAUG00000014818   | EMR1      | EGF-like module-containing mucin-like hormone receptor-like 1 precursor                        | 1.401            | 0.000755         |
| ENSGAUG00000016286   | PKD2      | Polycystin-2-like protein                                                                      | 1.368            | 0.00226          |
| ENSGAUG00000019259   | B3GALTL   | Beta-1,3-glucosyltransferase-like, predicted                                                   | 1.283            | 0.000725         |
| ENSGAUG00000018326   | NKX1-2    | NK1 transcription factor-related protein 2                                                     | 1.246            | 0.001345         |
| ENSGAUG00000007503   | AKAP12    | Uncharacterized protein                                                                        | 1.231            | 0.00017          |
| ENSGAUG00000012893   | ZNF423    | Zinc finger protein 423-like                                                                   | 1.227            | 0.00277          |
| ENSGAUG00000002110   | RNF38     | Uncharacterized protein                                                                        | 1.221            | 0.001335         |
| ENSGAUG00000017530   | KBTBD4    | Kelch repeat and BTB domain-containing protein 4, predicted                                    | 1.213            | 0.00369          |
| ENSGAUG00000004548   | CIR1      | Corepressor interacting with RBPJ 1-like, predicted                                            | 1.201            | 3.34E-06         |
| ENSGAUG00000010641   | PIK3CA    | Phosphatidylinositol-4,5-bisphosphate 3-kinase catalytic subunit alpha isoform-like, predicted | 1.191            | 0.00599          |
| ENSGAUG00000013093   | ENTHD2    | Uncharacterized protein C17orf56 homolog, predicted                                            | 1.19             | 0.01004          |
| ENSGAUG00000018999   | NDNF      | Fibronectin type-III domain-containing protein C4orf31 homolog, predicted                      | 1.181            | 6.54E-05         |
| ENSGAUG00000013599   | CHD3      | Chromodomain-helicase-DNA-binding protein 3, predicted                                         | 1.176            | 0.0036           |
| ENSGAUG00000011988   | H2B       | Histone H2B 1/2-like, predicted                                                                | 1.17             | 0.00229          |
| ENSGAUG00000017429   | LPPR5     | Lipid phosphate phosphatase-related protein type 5-like, predicted                             | 1.164            | 0.01714          |
| ENSGAUG00000010222_2 | Mboat2    | Membrane-bound O-acyltransferase domain-containing protein 2-like, predicted                   | 1.142            | 0.00038          |
| JK781143.1           | COX17     | Cytochrome c oxidase copper chaperone                                                          | 1.138            | 0.00068          |
| ENSGAUG00000006082   | CHST12    | Carbohydrate sulfotransferase 12-like, predicted                                               | 1.132            | 0.00066          |

|                      |           |                                                                                   |       |          |
|----------------------|-----------|-----------------------------------------------------------------------------------|-------|----------|
| ENSGAUG00000017772   | DNMBP     | Dynamin-binding protein-like, predicted                                           | 1.125 | 0.001945 |
| ENSGAUG00000000279   | KANSL1L   | Uncharacterized protein C2orf67 homolog, predicted                                | 1.1   | 0.01597  |
| JK759241.1           | predicted | Uncharacterized protein                                                           | 1.099 | 0.00071  |
| ENSGAUG00000007979   | ZNF532    | Zinc finger protein 532-like, predicted                                           | 1.083 | 0.015505 |
| ENSGAUG00000001682   | PLEKHG1   | Pleckstrin homology domain-containing family G member 1-like, predicted           | 1.069 | 0.00248  |
| ENSGAUG00000010186   | RBM22     | Pre-mRNA-splicing factor RBM22-like, predicted                                    | 1.063 | 0.001225 |
| ENSGAUG00000005024   | LNP1      | Uncharacterized protein                                                           | 1.047 | 0.00225  |
| ENSGAUG00000002564   | GUCY2C    | Heat-stable enterotoxin receptor-like, predicted                                  | 1.029 | 0.006855 |
| ENSGAUG00000009053   | IRAK1     | Interleukin-1 receptor activated kinase 1                                         | 1.027 | 0.000825 |
| ENSGAUG00000009691   | BBs9      | PTHB1-like protein                                                                | 1.017 | 0.00161  |
| ENSGAUG00000019046_2 | MAtr3     | Uncharacterized protein                                                           | 1.012 | 0.047975 |
| ENSGAUG00000004448   | TMC8      | Transmembrane channel-like protein 7                                              | 0.993 | 0.001695 |
| ENSGAUG00000006025   | RFC3      | Replication factor C subunit 3-like, predicted                                    | 0.981 | 0.012395 |
| ATLCOD1ESTi24380     | KMT5A     | N-lysine methyltransferase SETD8-A-like, predicted                                | 0.96  | 0.00123  |
| ENSGAUG00000010843   | NRIP2     | Nuclear receptor-interacting protein 2-like, predicted                            | 0.956 | 0.00219  |
| ENSGAUG00000000191   | DYRK4     | Dual specificity tyrosine-phosphorylation-regulated kinase 4-like, predicted      | 0.952 | 0.002485 |
| ENSGAUG00000006720   | PDLIM7    | PDZ and LIM domain protein 7                                                      | 0.949 | 0.00219  |
| ENSGAUG00000005277   | ASPH      | Aspartate beta-hydroxylase                                                        | 0.947 | 6.33E-05 |
| ENSGAUG00000016074   | AAMP      | Angio-associated migratory cell protein-like, predicted                           | 0.938 | 0.002585 |
| ENSGAUG00000006980_2 | ASPM      | Abnormal spindle-like microcephaly-associated protein homolog, predicted          | 0.937 | 0.002445 |
| ENSGAUG00000002655   | UBE2V2    | Ubiquitin-conjugating enzyme E2 variant 2                                         | 0.937 | 0.01275  |
| ATLCOD1ESTi11511     | DIS3      | Exosome complex exonuclease RRP44                                                 | 0.936 | 0.000325 |
| ENSGAUG00000007757   | SLC2A4    | Solute carrier family 2, facilitated glucose transporter member 4-like, predicted | 0.935 | 0.002195 |
| ENSGAUG00000003702   | OSBPL2    | Oxysterol-binding protein-related protein 2, predicted                            | 0.925 | 0.00186  |
| ENSGAUG00000003347   | DNAJC21   | DNAJ homolog subfamily C member 21-like, predicted                                | 0.923 | 0.00274  |
| ENSGAUG00000017967   | RFESD     | Rieske domain-containing protein                                                  | 0.921 | 0.0017   |
| ENSGAUG00000014477   | SSPO      | SCO-spondin, predicted                                                            | 0.914 | 0.023125 |

|                      |           |                                                                                     |       |            |
|----------------------|-----------|-------------------------------------------------------------------------------------|-------|------------|
| ENSGAUG00000016130   | THRA      | Thyroid hormone receptor alpha, predicted                                           | 0.897 | 0.001265   |
| ENSGAUG00000010653   | STAC2     | SH3 and cysteine-rich domain-containing protein-like, predicted                     | 0.896 | 0.001435   |
| ENSGAUG00000006651   | BCAT5     | Branched-chain-amino-acid aminotransferase, cytosolic                               | 0.895 | 0.000355   |
| ENSGAUG00000018119   | MRGBP     | MRG-binding protein-like isoform 2, predicted                                       | 0.892 | 0.00036281 |
| ENSGAUG00000010089   | predicted | Uncharacterized protein                                                             | 0.891 | 0.009605   |
| ENSGAUG00000012154   | PRKRIR    | Uncharacterized protein                                                             | 0.886 | 0.000175   |
| ENSGAUG00000016339   | NDUFA4L2  | NADH dehydrogenase [ubiquinone] 1 alpha subcomplex subunit 4-like 2-like, predicted | 0.882 | 0.030095   |
| ENSGAUG00000003179   | LUC7L3    | Uncharacterized protein                                                             | 0.873 | 0.00017596 |
| ENSGAUG00000020508   | RAP2B     | Ras-related protein Rap-2b-like, predicted                                          | 0.869 | 0.00092218 |
| ENSGAUG00000013318   | PHF5A     | PHD finger-like domain-containing protein 5A                                        | 0.868 | 0.01581    |
| FG324761.1           | ARHGAP11A | Rho GTPase-activating protein 11A-like, predicted                                   | 0.863 | 0.00556    |
| ATLCOD1ESTi27138     | SMAP      | Uncharacterized protein                                                             | 0.859 | 0.00467    |
| ENSGAUG00000006434   | SH3RF1    | E3 ubiquitin-protein ligase SH3RF1-like, predicted                                  | 0.858 | 0.013665   |
| ATLCOD1ESTi10705     | VCL       | Vinculin-like, predicted                                                            | 0.855 | 0.00064    |
| ENSGAUG00000016680   | GNRH3     | Progonadoliberin-3 isoform 1, predicted                                             | 0.849 | 0.00504    |
| ENSGAUG00000011627   | ARHGAP44  | Rho GTPase-activating protein 44-like, predicted                                    | 0.849 | 0.0163     |
| ENSGAUG00000009106   | HDHD5     | Cat eye syndrome critical region protein 5-like, predicted                          | 0.847 | 0.014685   |
| ENSGAUG00000014465   | DCUN1D1   | DCN1-like protein 5                                                                 | 0.843 | 0.004535   |
| ENSGAUG00000018394   | ITGB1     | Integrin, beta 1b.2 precursor                                                       | 0.843 | 0.00396    |
| ENSGAUG00000013372   | COL11A2   | Collagen alpha-2(IX) chain-like, predicted                                          | 0.838 | 0.00833    |
| JK759682.1           | DPY30     | Protein dpy-30 homolog, predicted                                                   | 0.838 | 0.00028    |
| ENSGAUG00000000692   | predicted | Uncharacterized protein                                                             | 0.838 | 0.002955   |
| JK775390.1           | NSMCE2    | E3 SUMO-protein ligase NSE2-like, predicted                                         | 0.837 | 0.00461    |
| ENSGAUG00000015650   | C1orf131  | Uncharacterized protein C1orf131-like, predicted                                    | 0.831 | 0.00488    |
| ENSGAUG00000019745   | predicted | Uncharacterized protein                                                             | 0.821 | 0.00644    |
| ENSGAUG00000007235_1 | HES4      | Transcription factor HES-4-like, predicted                                          | 0.82  | 0.00453    |
| ATLCOD1ESTi13247     | CHTF8     | Chromosome transmission fidelity protein 8 homolog, predicted                       | 0.814 | 0.03279    |
| ENSGAUG00000010222   | Mboat2    | Membrane-bound O-acyltransferase domain-containing protein 2-like, predicted        | 0.814 | 0.00071    |

|                        |          |                                                                                |       |          |
|------------------------|----------|--------------------------------------------------------------------------------|-------|----------|
| ENSGAUG00000008020     | GPC5     | Uncharacterized protein                                                        | 0.811 | 0.003625 |
| ENSGAUG00000015858     | FAT3     | Protocadherin Fat 3-like, predicted                                            | 0.805 | 0.00518  |
| ENSGAUG00000004374     | HIST1H1A | Uncharacterized protein                                                        | 0.804 | 0.00863  |
| ENSGAUG00000006617     | OTUD5    | OTU domain-containing protein 5-A-like, predicted                              | 0.803 | 0.00351  |
| CUST_37315_P1425838995 |          | Unknown probe; no match against cod transcripts or sequences in the cod genome | 1.258 | 0.00206  |
| CUST_37314_P1425838995 |          | Unknown probe; no match against cod transcripts or sequences in the cod genome | 1.224 | 0.00227  |
| CUST_20633_P1425838995 |          | Unknown probe; no match against cod transcripts or sequences in the cod genome | 1.026 | 0.01041  |
| CUST_17997_P1425838995 |          | Unknown probe; no match against cod transcripts or sequences in the cod genome | 0.978 | 0.0005   |
| ES478198.1             |          | Unknown protein; this transcript has no score against other known proteins     | 1.022 | 0.00059  |
| JK758476.1             |          | Unknown transcript; no similarity to other known proteins                      | 1.28  | 0.0033   |
| ENSGAUG00000000597     |          | Unknown transcript; no similarity to other known proteins                      | 1.266 | 0.00138  |
| JK770651.1             |          | Unknown transcript; no similarity to other known proteins                      | 1.163 | 0.01395  |
| ATLCOD1ESTi39954       |          | Unknown transcript; no similarity to other known proteins                      | 0.952 | 0.00043  |
| JK759699.1             |          | Unknown transcript; no similarity to other known proteins                      | 0.89  | 0.0005   |
| ENSGAUG00000010415     |          | Unknown transcript; no similarity to other known proteins                      | 0.853 | 0.00077  |
| JK782837.1             |          | Unknown transcript; no similarity to other known proteins                      | 0.846 | 0.00223  |
| JK758705.1             |          | Unknown transcript; no similarity to other known proteins                      | 0.845 | 0.04586  |
| JK760351.1             |          | Unknown transcript; no similarity to other known proteins                      | 0.833 | 0.00728  |
| JK764075.1             |          | Unknown transcript; no similarity to other known proteins                      | 0.82  | 0.00094  |
| FG318028.1             |          | Unknown transcript; no similarity to other known proteins                      | 0.818 | 0.00083  |
