# Supplementary material for: Commensal and Opportunistic Bacteria Present in the Microbiota in Atlantic Cod (Gadus morhua) Larvae Differentially Alter the Hosts’ Innate Immune Responses
Source: MDPI journal article supplement (doi:10.3390/microorganisms10010024), 2021-12-24
Supplement: s1 [file s1]

Table S1: List of down-regulated genes (cut-off value of log2 fold change > 0.8) in conventional cod larvae compared with germ-free cod larvae at 16 dph.

| Accession number     | Gene name | Description                                                 | Log2 fold change | Adjusted p-value |
|----------------------|-----------|-------------------------------------------------------------|------------------|------------------|
| ENSGAUG00000005408   | CUZD1     | Zona pellucida-like domain-containing protein               | -2.792           | 0.000100535      |
| ENSGAUG00000012193   | EPX       | Eosinophil peroxidase peroxidase-like                       | -2.407           | 5.89E-05         |
| ENSGAUG00000006436   | EPX       | Eosinophil peroxidase                                       | -1.784           | 0.010355002      |
| ENSGAUG00000015302   | TMPRSS9   | Transmembrane protease serine 9-like; partial ORF           | -1.644           | 4.05E-06         |
| ENSGAUG00000015614_3 | C1QL3     | Complement C1q-like protein 3-like                          | -1.633           | 0.0008           |
| ENSGAUG00000017013   | MYOC      | Myocilin                                                    | -1.555           | 0.00324          |
| ENSGAUG00000010274   | MPO       | Myeloperoxidase precursor                                   | -1.499           | 0.000508003      |
| ENSGAUG00000000611   | RBL       | Rhamnose-binding lectin                                     | -1.475           | 4.98E-07         |
| ENSGAUG00000004081   | HCE       | low choriolytic enzyme-like, predicted                      | -1.457           | 4.42E-05         |
| ENSGAUG00000003520   | SEPP1     | Selenoprotein P                                             | -1.451           | 0.000825         |
| ENSGAUG00000009502   | ctrb1     | Uncharacterized protein                                     | -1.256           | 0.01677          |
| ENSGAUG00000005121   | CYBB      | Cytochrome b-245 heavy chain-like                           | -1.251           | 3.92E-05         |
| ENSGAUG00000009693   | PRSS27    | Serine protease 27-like, predicted                          | -1.251           | 2.31E-05         |
| ENSGAUG00000012542   | APOD      | Apolipoprotein D-like, predicted                            | -1.249           | 0.021925         |
| ENSGAUG00000012822   | ABCA12    | ATP-binding cassette sub-family A member 12-like, predicted | -1.219           | 0.001            |
| ENSGAUG00000001749_1 | GPRC6A    | G-protein coupled receptor family C group 6 member A        | -1.205           | 4.92E-07         |
| ENSGAUG00000011292   | SPINT2    | Kunitz-type protease inhibitor 2 precursor                  | -1.187           | 4.66E-05         |
| ENSGAUG00000001749   | GPRC6A    | G-protein coupled receptor family C group 6 member A        | -1.185           | 4.88E-07         |
| ENSGAUG00000020348   | FEL       | Fish-egg lectin                                             | -1.142           | 6.62E-05         |
| ENSGAUG00000000775   | Rhcg      | Ammonium transporter Rh type C                              | -1.134           | 0.001845         |
| ENSGAUG00000014136   | PDLIM5    | PDZ and LIM domain protein 5-like                           | -1.089           | 0.000235         |
| ENSGAUG00000009769   | PGLYRP1   | N-acetylmuramoyl-L-alanine amidase-like                     | -1.065           | 0.000195495      |
| ENSGAUG00000008126   | ZGP16     | Zymogen granule membrane protein 16                         | -1.061           | 0.00044          |
| ENSGAUG00000010286   | epx       | Eosinophil peroxidase                                       | -1.052           | 0.01751          |
| ENSGAUG00000009511_1 | ctrb2     | Chymotrypsin B                                              | -1.047           | 0.02769          |

|                    |           |                                                            |        |             |
|--------------------|-----------|------------------------------------------------------------|--------|-------------|
| ENSGAUG00000015892 | ARHGAP6   | Rho GTPase-activating protein 6                            | -1.041 | 7.34E-06    |
| ENSGAUG00000013172 | CeLA1     | Elastase-like protein                                      | -1.023 | 0.03216     |
| ENSGAUG00000000080 | CTRL      | Chymotrypsin-like protease CTRL-1 precursor                | -1.022 | 0.02384     |
| ENSGAUG00000019115 | PLD3      | Phospholipase D3                                           | -1     | 0.000113925 |
| ENSGAUG00000003430 | Cpa2      | Carboxypeptidase A2 precursor                              | -0.99  | 0.02862     |
| ENSGAUG00000015335 | IGF1R     | Insulin-like growth factor 1 receptor                      | -0.97  | 0.00041     |
| ENSGAUG00000006000 | Irg1      | Immune-responsive gene 1 protein-like                      | -0.966 | 0.000154035 |
| ENSGAUG00000006754 | MOV10     | Putative helicase mov-10-B.2-like, predicted               | -0.961 | 0.01108     |
| ENSGAUG00000000958 | RNF213    | RING finger protein 213-like, predicted                    | -0.959 | 0.009085    |
| ENSGAUG00000009283 | NME2      | Nucleoside diphosphate kinase B isoform a                  | -0.946 | 0.015995    |
| ENSGAUG00000007716 | ZBTB4     | Uncharacterized protein                                    | -0.945 | 0.017470097 |
| ENSGAUG00000008762 | predicted | Uncharacterized protein                                    | -0.936 | 5.69E-05    |
| ENSGAUG00000017352 | bco2      | Beta,beta-carotene 9',10'-oxygenase-like, predicted        | -0.935 | 0.007315    |
| FF406537.1         | SPINK2    | Serine protease inhibitor Kazal-type 2-like, predicted     | -0.929 | 0.00178     |
| ENSGAUG00000016860 | DSP       | Desmoplakin, predicted                                     | -0.913 | 0.0199      |
| ENSGAUG00000005570 | Rbp3      | Retinol-binding protein 3-like                             | -0.913 | 0.00415     |
| ENSGAUG00000017471 | MSLN      | Uncharacterized protein                                    | -0.912 | 0.000955    |
| ENSGAUG00000008774 | OTOP2     | Otopetrin-2-like                                           | -0.909 | 1.75E-05    |
| ENSGAUG00000008734 | UBL1      | Ubiquitin-like protein precursor                           | -0.902 | 0.02574     |
| ENSGAUG00000001451 | TRAF3IP2  | Adapter protein CIKS-like, predicted                       | -0.901 | 0.00058     |
| ENSGAUG00000007277 | CRYBB1    | Beta-crystallin B1-like, predicted                         | -0.901 | 0.00142     |
| ENSGAUG00000002315 | SDS       | L-serine dehydratase/L-threonine deaminase-like, predicted | -0.891 | 0.01677     |
| EX725973.1         | SPINK1    | Pancreatic secretory trypsin inhibitor                     | -0.889 | 0.00548     |
| ENSGAUG00000014401 | Cfad      | Counting factor associated protein D-like, predicted       | -0.885 | 0.002775    |
| ENSGAUG00000012105 | MYOC      | Myocilin-like, predicted                                   | -0.885 | 0.00214     |
| ENSGAUG00000005518 | NKX3-1    | Homeobox protein Nkx-3.1-like                              | -0.882 | 0.00166     |
| ENSGAUG00000014896 | ApoL1     | ApoL super family protein                                  | -0.879 | 0.00037     |
| ENSGAUG00000010299 | CMPK2     | UMP-CMP kinase 2, mitochondrial-like, predicted            | -0.879 | 0.00459     |
| ENSGAUG00000005387 | predicted | Uncharacterized protein                                    | -0.876 | 0.000365    |
| ENSGAUG00000019464 | LRR16A    | leucine-rich repeat-containing protein 16A-like, predicted | -0.863 | 0.010275    |

|                      |               |                                                                                    |        |             |
|----------------------|---------------|------------------------------------------------------------------------------------|--------|-------------|
| ENSGAUG00000013953   | RSRC2         | Arginine/serine-rich coiled-coil protein 2-like, predicted                         | -0.86  | 0.015415    |
| ENSGAUG00000011643   | CFAP74        | Uncharacterized protein KIAA1751 homolog, predicted                                | -0.857 | 0.0139      |
| ENSGAUG00000012948_1 | PRSS1         | Trypsin-1 precursor                                                                | -0.853 | 0.04893     |
| ENSGAUG00000016090   | GTPBP4        | Nucleolar GTP-binding protein 1, predicted                                         | -0.851 | 0.004785    |
| ENSGAUG00000007955_3 | PNLIPRP1      | Pancreatic lipase-related protein                                                  | -0.843 | 0.033135    |
| ENSGAUG00000016793   | POR           | NADPH--cytochrome P450 reductase-like, predicted                                   | -0.842 | 0.011765    |
| ENSGAUG00000016899   | NID2          | Nidogen-2, predicted                                                               | -0.842 | 0.000645    |
| ENSGAUG00000019687   | DVL1          | Segment polarity protein dishevelled homolog DVL-1-like isoform 2, predicted       | -0.841 | 0.00225781  |
| ENSGAUG00000004250   | col6a1        | Collagen alpha-1(VI) chain-like, predicted                                         | -0.84  | 5.55E-05    |
| ENSGAUG00000006831   | CRYBA1        | Beta-crystallin A1-like, predicted                                                 | -0.835 | 0.001375225 |
| ENSGAUG00000009144   | SErPINA1<br>0 | Protein Z-dependent protease inhibitor-like, predicted                             | -0.835 | 0.000538925 |
| ENSGAUG00000000514   | SQSTM1        | Sequestosome-1                                                                     | -0.833 | 0.042225    |
| ENSGAUG00000013176   | CAPN3         | Calpain-3-like, predicted                                                          | -0.828 | 0.000385    |
| ENSGAUG00000018097   | Bcl6          | B-cell lymphoma 6 protein homolog, predicted                                       | -0.826 | 0.00096     |
| ENSGAUG00000000178   | atp6v1b       | V-type proton ATPase subunit B, brain isoform-like, predicted                      | -0.823 | 0.000495    |
| ENSGAUG00000018340   | CAPN2         | Calpain-2 catalytic subunit                                                        | -0.821 | 0.021775    |
| ENSGAUG00000003005   | CKB           | Creatine kinase B-type                                                             | -0.82  | 0.0011      |
| ENSGAUG00000000260   | anxa11        | Annexin A11b                                                                       | -0.818 | 0.00041     |
| ENSGAUG00000004348   | PPP3CC        | Serine/threonine-protein phosphatase 2B catalytic subunit gamma isoform, predicted | -0.817 | 2.13E-05    |
| ENSGAUG00000009193   | and1          | Actinodin1 precursor                                                               | -0.816 | 0.00972     |
| ENSGAUG00000019589   | crybb1        | Beta-crystallin B1-like, predicted                                                 | -0.814 | 0.000765    |
| ENSGAUG00000002737   | IRF4          | Interferon regulatory factor 4-like                                                | -0.81  | 0.01243     |
| ENSGAUG00000008523   | predicted     | Zona pellucida-like domain-containing protein                                      | -0.809 | 0.002275    |
| ENSGAUG00000000027   | COL24A1       | Collagen alpha-1(X) chain-like isoform 2, predicted                                | -0.802 | 0.02197     |
